# Supplementary material
Source: PubMed Central journal article supplement (PMC7474867)
Supplement: NIHMS1623340-supplement-Supplementary_Material.pdf [file NIHMS1623340-supplement-Supplementary_Material.pdf]

## Expression and regulation of the *Pseudomonas aeruginosa* hibernation promoting factor

### Supplementary Information Table of Contents

Table S1. Strains and Genetic Constructs used in this study

Table S2. DNA Oligonucleotides used in this study.

Fig S1. Schematic representation of *hpf* distribution among diverse species of bacteria

Fig S2. Schematic representation of reporter constructs used in these studies.

Fig S3. Bioanalyzer analysis of RT-qPCR products produced from  $P_{hpf}$  and  $P_{rpoN}$

Fig S4. Effect of RpoN on expression of *hpf*.

Fig S5. Growth phase dependence on expression of *hpf*.

Fig S6. Expression rate of  $P_{hpf}$  in mutants strains impaired in stationary phase factors.

Fig S7. Effect of stationary phase factors on expression from  $P_{rpoN}$ - $rpoN$ - $P_{hpf}$  *hpf-yfp* reporter.

Fig S8. Expression of *hpf-yfp* reporter with the  $P_{hpf}$  promoter replaced by the  $P_{BAD}$  promoter, in the absence of arabinose induction.

Fig S9. Fig S9. Secondary structure predictions of the *hpf* mRNA and 5'UTR modified with point mutations.

Table S1. Expression reporters

| Strain or plasmid                                                                           | Identifier | Genotype and relevant characteristics                                                                                                                                                                                                                              | Source or reference    |
|---------------------------------------------------------------------------------------------|------------|--------------------------------------------------------------------------------------------------------------------------------------------------------------------------------------------------------------------------------------------------------------------|------------------------|
| <b>Strains</b>                                                                              |            |                                                                                                                                                                                                                                                                    |                        |
| <i>Pseudomonas aeruginosa</i><br>PAO1                                                       |            |                                                                                                                                                                                                                                                                    |                        |
| <i>Pseudomonas aeruginosa</i><br>PAO1 $\Delta relA/\Delta spoT$                             |            | <i>relA</i> $\Delta$ 181 – 2019, <i>spoT</i> $\Delta$ 200 – 1948                                                                                                                                                                                                   | Nguyen 2013            |
| <i>Pseudomonas aeruginosa</i><br>PAO1 $\Delta hpf$                                          |            |                                                                                                                                                                                                                                                                    | Williamson 2012        |
| <i>Pseudomonas aeruginosa</i><br>PAO1 $\Delta dksA2$                                        |            | PW10380 from University of Washington <i>Pseudomonas aeruginosa</i> PAO1 transposon mutant Two-Allele Library                                                                                                                                                      | Jacobs 2003, Held 2012 |
| <i>Pseudomonas aeruginosa</i><br>PAO1 $\Delta rpoS$                                         |            | PW7151 from University of Washington <i>Pseudomonas aeruginosa</i> PAO1 transposon mutant Two-Allele Library                                                                                                                                                       | Jacobs 2003, Held 2012 |
| <b>Plasmids</b>                                                                             |            |                                                                                                                                                                                                                                                                    |                        |
| pUC18T-mini-Tn7T-Gm- <i>eyfp</i>                                                            |            | Mini-Tn7 base vector with MCS, Gm <sup>R</sup> , and <i>eyfp</i>                                                                                                                                                                                                   | Choi 2005              |
| pTJ1                                                                                        |            | Mini-Tn7 base vector with MCS, P <sub>BAD</sub> promoter, Tp <sup>R</sup> , and <i>araC</i>                                                                                                                                                                        | Damron 2013            |
| pTNS1                                                                                       |            | Helper plasmid encoding TnsABCD transposon machinery                                                                                                                                                                                                               | Choi 2005              |
| pCR2.1                                                                                      |            | TA cloning vector                                                                                                                                                                                                                                                  | Invitrogen®            |
| pCR- <i>hpf</i>                                                                             |            | TA cloning vector with PCR product of PA4463 <i>StuI</i> 5' + PA4463 <i>SphI</i> 3' from PAO1 genome                                                                                                                                                               | This study             |
| pCR- <i>rpoN</i>                                                                            |            | TA cloning vector with PCR product of <i>RpoN</i> <i>StuI</i> 5' + <i>RpoN</i> <i>StuI</i> 3' from PAO1 genome                                                                                                                                                     | This study             |
| pCR- <i>rpoN</i> <sub>147</sub>                                                             |            | TA cloning vector with PCR product of <i>RpoN</i> <i>StuI</i> 5' + 3' <i>RpoN</i> 147- <i>StuI</i> from PAO1 genome                                                                                                                                                | This study             |
| pCR-TSS1- <i>hpf-yfp</i>                                                                    |            | TA cloning vector with PCR product of 5'HPFtss1-EcoRI + PA4463 <i>SphI</i> 3' from P <sub><i>hpf</i></sub> <i>hpf-yfp</i> plasmid                                                                                                                                  | This study             |
| pCR-TSS2- <i>hpf-yfp</i>                                                                    |            | TA cloning vector with PCR product of 5'HPFtss2-EcoRI + PA4463 <i>SphI</i> 3' from P <sub><i>hpf</i></sub> <i>hpf-yfp</i> plasmid                                                                                                                                  | This study             |
| pCR-TSS3- <i>hpf-yfp</i>                                                                    |            | TA cloning vector with PCR product of 5'HPFtss3-EcoRI + PA4463 <i>SphI</i> 3' from P <sub><i>hpf</i></sub> <i>hpf-yfp</i> plasmid                                                                                                                                  | This study             |
| pCR-Up207                                                                                   |            | TA cloning vector with PCR product of 5'HPFup207-KpnI + PA4463 <i>SphI</i> 3' from PAO1 genome                                                                                                                                                                     | This study             |
| pCR-PA4463prom                                                                              |            | TA cloning vector with PCR product of PA4463 <i>StuI</i> 5' + 3'PA4463prom- <i>SphI</i> from PAO1 genome                                                                                                                                                           | This study             |
| pCR- <i>hpf</i> <sub>43</sub>                                                               |            | TA cloning vector with PCR product of PA4463 <i>StuI</i> 5' + 3'HPF43- <i>SphI</i> from PAO1 genome                                                                                                                                                                | This study             |
| pCR- <i>hpf</i> <sub>130</sub>                                                              |            | TA cloning vector with PCR product of PA4463 <i>StuI</i> 5' + 3'HPF130- <i>SphI</i> from PAO1 genome                                                                                                                                                               | This study             |
| <b>Tn7-YFP reporters</b>                                                                    |            |                                                                                                                                                                                                                                                                    |                        |
| P <sub><i>hpf</i></sub> <i>hpf-yfp</i>                                                      | A          | pUC18T-mini-Tn7T-Gm- <i>eyfp</i> carrying P <sub><i>hpf</i></sub> and in-frame fusion of HPF-YFP (translational reporter); <i>StuI</i> - <i>SphI</i> fragment from pCR- <i>hpf</i> ligated into pUC18T-mini-Tn7T-Gm- <i>eyfp</i>                                   | This study             |
| P <sub><i>rpoN</i></sub> <i>rpoN</i> -P <sub><i>hpf</i></sub> <i>hpf-yfp</i>                | B          | pUC18T-mini-Tn7T-Gm- <i>eyfp</i> carrying P <sub><i>rpoN</i></sub> , <i>rpoN</i> , P <sub><i>hpf</i></sub> , and in-frame fusion of HPF-YFP; <i>StuI</i> fragment from pCR- <i>rpoN</i> ligated into P <sub><i>hpf</i></sub> <i>hpf-yfp</i>                        | This study             |
| P <sub><i>rpoN</i></sub> TSS1- <i>hpf-yfp</i>                                               | C          | pUC18T-mini-Tn7T-Gm- <i>eyfp</i> carrying P <sub><i>rpoN</i></sub> and promoterless HPF-YFP reporter with 5'UTR starting from TSS1; <i>StuI</i> -KpnI fragment from pCR- <i>rpoN</i> ligated into TSS1- <i>hpf-yfp</i>                                             | This study             |
| P <sub><i>rpoN</i></sub> <i>rpoN</i> <sub>1296</sub> -TSS1- <i>hpf-yfp</i>                  | D          | pUC18T-mini-Tn7T-Gm- <i>eyfp</i> carrying P <sub><i>rpoN</i></sub> , 1296 nt of <i>rpoN</i> , and promoterless HPF-YFP reporter with 5'UTR starting from TSS1; <i>StuI</i> fragment of pCR- <i>rpoN</i> ligated into TSS1- <i>hpf-yfp</i>                          | This study             |
| P <sub><i>rpoN</i></sub> <i>rpoN</i> <sub>147</sub> -P <sub><i>hpf</i></sub> <i>hpf-yfp</i> | E          | pUC18T-mini-Tn7T-Gm- <i>eyfp</i> carrying P <sub><i>rpoN</i></sub> , 147 nt of <i>rpoN</i> , P <sub><i>hpf</i></sub> , and in-frame fusion of HPF-YFP; <i>StuI</i> fragment of pCR- <i>rpoN</i> <sub>147</sub> ligated into P <sub><i>hpf</i></sub> <i>hpf-yfp</i> | This study             |
| TSS1- <i>hpf-yfp</i>                                                                        | F          | pUC18T-mini-Tn7T-Gm- <i>eyfp</i> carrying a promoterless HPF-YFP and 5'UTR starting from TSS1; KpnI- <i>SphI</i> fragment of pCR-TSS1- <i>hpf-yfp</i> ligated into pUC18T-mini-Tn7T-Gm- <i>eyfp</i>                                                                | This study             |

|                                                          |   |                                                                                                                                                                                                                                                                                                                                                  |            |
|----------------------------------------------------------|---|--------------------------------------------------------------------------------------------------------------------------------------------------------------------------------------------------------------------------------------------------------------------------------------------------------------------------------------------------|------------|
| TSS2- <i>hpf-yfp</i>                                     | G | pUC18T-mini-Tn7T-Gm- <i>eyfp</i> carrying a promoterless HPF-YFP and 5'UTR starting from TSS2; KpnI-SphI fragment from pCR-TSS2- <i>hpf-yfp</i> ligated into pUC18T-mini-Tn7T-Gm- <i>eyfp</i>                                                                                                                                                    | This study |
| TSS3- <i>hpf-yfp</i>                                     | H | pUC18T-mini-Tn7T-Gm- <i>eyfp</i> carrying a promoterless HPF-YFP and 5'UTR starting from TSS3; KpnI-SphI fragment from pCR-TSS3- <i>hpf-yfp</i> ligated into EcoRI-SphI site of pUC18T-mini-Tn7T-Gm- <i>eyfp</i>                                                                                                                                 | This study |
| Up207-P <sub>hpf</sub> <i>hpf-yfp</i>                    | I | P <sub>hpf</sub> <i>hpf-yfp</i> plasmid with putative UP element and upstream sequence removed; KpnI-SphI fragment of pCR-Up207 ligated into pUC18T-mini-Tn7T-Gm- <i>eyfp</i>                                                                                                                                                                    | This study |
| P <sub>BAD</sub> TSS1- <i>hpf-yfp</i>                    | J | pTJ1 containing TSS1- <i>hpf-yfp</i> under P <sub>BAD</sub> ; EcoRI-SphI fragment of pCR-TSS1- <i>hpf-yfp</i> ligated into pTJ1                                                                                                                                                                                                                  | This study |
| P <sub>BAD</sub> TSS2- <i>hpf-yfp</i>                    | K | pTJ1 containing TSS2- <i>hpf-yfp</i> under P <sub>BAD</sub> ; EcoRI-SphI fragment of pCR-TSS2- <i>hpf-yfp</i> ligated into pTJ1                                                                                                                                                                                                                  | This study |
| P <sub>BAD</sub> TSS3- <i>hpf-yfp</i>                    | L | pTJ1 containing TSS3- <i>hpf-yfp</i> under P <sub>BAD</sub> ; EcoRI-SphI fragment of pCR-TSS3- <i>hpf-yfp</i> ligated into pTJ1                                                                                                                                                                                                                  | This study |
| P <sub>hpf</sub> 5'UTR- <i>yfp</i>                       | M | pUC18T-mini-Tn7T-Gm- <i>eyfp</i> carrying P <sub>hpf</sub> and 5'UTR fused to <i>eyfp</i> (transcriptional reporter); StuI-SphI fragment from pCR-PA4463prom ligated into pUC18T-mini-Tn7T-Gm- <i>eyfp</i>                                                                                                                                       | This study |
| P <sub>hpf</sub> <i>yfp</i>                              | N | pUC18T-mini-Tn7T-Gm- <i>eyfp</i> carrying P <sub>hpf</sub> fused to <i>eyfp</i> ; StuI-KpnI digested PCR product of PA4463 StuI 5' + 3'HPFprom-KpnI ligated into RBS- <i>yfp</i>                                                                                                                                                                 | This study |
| RBS- <i>yfp</i>                                          | O | pUC18T-mini-Tn7T-Gm- <i>eyfp</i> with PA1/04/03 promoter sequence removed; Annealed oligonucleotides 5'KpnI-RBS-SphI + 3'KpnI-RBS-SphI were ligated into KpnI-SphI site of pUC18T-mini-Tn7T-Gm- <i>eyfp</i>                                                                                                                                      | This study |
| P <sub>hpf</sub> <i>hpf</i> <sub>9081</sub> - <i>yfp</i> | P | pUC18T-mini-Tn7T-Gm- <i>eyfp</i> carrying P <sub>hpf</sub> and in-frame fusion of partial HPF (9081 aa) and YFP; StuI-SphI digested PCR product of PA4463 StuI 5' + 3'HPF243-SphI from PAO1 genome ligated into StuI-SphI site of pUC18T-mini-Tn7T-Gm- <i>eyfp</i>                                                                               | This study |
| P <sub>hpf</sub> <i>hpf</i> <sub>43</sub> - <i>yfp</i>   | Q | pUC18T-mini-Tn7T-Gm- <i>eyfp</i> carrying P <sub>hpf</sub> and in-frame fusion of partial HPF (43 aa) and YFP; StuI-SphI fragment from pCR- <i>hpf</i> <sub>30</sub> ligated into pUC18T-mini-Tn7T-Gm- <i>eyfp</i>                                                                                                                               | This study |
| P <sub>hpf</sub> <i>hpf</i> <sub>142</sub> - <i>yfp</i>  | R | pUC18T-mini-Tn7T-Gm- <i>eyfp</i> carrying P <sub>hpf</sub> and in-frame fusion of partial HPF (142 aa) and YFP (partial translational reporter); StuI-SphI fragment from pCR- <i>hpf</i> <sub>43</sub> ligated into pUC18T-mini-Tn7T-Gm- <i>eyfp</i>                                                                                             | This study |
| P <sub>BAD</sub> <i>hpf-yfp</i>                          |   | pTJ1 containing an in-frame fusion of HPF-YFP under P <sub>BAD</sub> ; NcoI-NotI digested PCR production of 5'_NcoI_hpf_inframe + 3'yfp-term-NotI from P <sub>hpf</sub> <i>hpf-yfp</i> ligated into NcoI-NotI site of pTJ1                                                                                                                       | This study |
| P <sub>hpf</sub> mod1- <i>hpf-yfp</i>                    | S | P <sub>hpf</sub> <i>hpf-yfp</i> plasmid with modification of putative HPL sequence at 5' coding sequence of <i>hpf</i> reducing the HPL stability; StuI-SphI digested fused fragments from overlap extension PCR using PA4463 StuI 5' + 3'HPLmod1 and 5'HPLmod1 + PA4463 SphI 3' ligated into StuI-SphI site of pUC18T-mini-Tn7T-Gm- <i>eyfp</i> | This study |
| P <sub>hpf</sub> mod4- <i>hpf-yfp</i>                    | U | P <sub>hpf</sub> <i>hpf-yfp</i> plasmid with modification of 3' end putative HPL stem at 5' UTR of <i>hpf</i> reducing the HPL stability; StuI-SphI digested fused used fragments of overlap extension PCR using PA4463 StuI 5' + 3'HPLmod4 and 5'HPLmod4 + PA4463 SphI 3' ligated into StuI-SphI site of pUC18T-mini-Tn7T-Gm- <i>eyfp</i>       | This study |
| P <sub>hpf</sub> mod5- <i>hpf-yfp</i>                    | V | P <sub>hpf</sub> <i>hpf-yfp</i> plasmid with modification of 5' end putative HPL stem at 5' UTR of <i>hpf</i> reducing the HPL stability; StuI-SphI digested fused used fragments of overlap extension PCR using PA4463 StuI 5' + 3'HPLmod5 and 5'HPLmod5 + PA4463 SphI 3' ligated into StuI-SphI site of pUC18T-mini-Tn7T-Gm- <i>eyfp</i>       | This study |

Table S2: Primer sequences used in this study

| Primer Name                 | Sequence (5' -> 3')                                           |
|-----------------------------|---------------------------------------------------------------|
| <u>molecular constructs</u> |                                                               |
| PA4463 Stul 5'              | GAAGGCCTGGAATGCTCGTCCACCGCGATCCG                              |
| PA4463 SphI 3'              | AGGCATGCGGGCGCCTACGCCTTGCTGCCG                                |
| RpoN Stul 5'                | GAAGGCCTGCTGCAGGAATTCCACATCCAC                                |
| RpoN Stul 3'                | CCAGGCCTTCAGCGGTACTGACGTGACT                                  |
| 3'RpoN147-Stul              | GAAGGCCTGCATGCGTTTCGAGCATGGGATTGGATT                          |
| 5'HPFtss1-EcoRI             | ATGGTACCGAATTCACAGGGCATTCAAGTGGCTCGC                          |
| 5'HPFtss2-EcoRI             | ATGGTACCGAATTCGTTCCGGAGGCAGGTTGCTAACCTG                       |
| 5'HPFtss3-EcoRI             | ATGGTACCGAATTCACACACGGGCAACAAGGAGAACGC                        |
| 5'HPFup207-KpnI             | ATGGTACCGCCATTGAGCGACAGCAAGATC                                |
| 3'PA4463prom-SphI           | CAGCATGCCGCGTTCTCCTTGTTGCCCGTG                                |
| 3'HPFprom-KpnI              | CTAGGTACCGCCTCCAGTAAACCAGCGATCTTG                             |
| 3'HPF43-SphI                | GAGCATGCCGTCGGTCACATCCAGTTGATGG                               |
| 3'HPF130-SphI               | GAGCATGCCGACCTCCATGATCACCTGAACAT                              |
| 3'HPF243-SphI               | ATGCATGCTCTCTTTGTGTTTGATCAGTTGACGG                            |
| 5'_NcoI_hpf_inframe         | TTACCATGGAAGTCAACATCAGTGGC                                    |
| 3'yfp-term-NotI             | ATGCGGCCGCTAATTTCGATCATGCATGAGCTCG                            |
| 5'HPLmod1                   | GCAAGTCAACATCAGTGGCCATCAGTTGGACGTAACCGACGCCCTGCGCGACTA        |
| 5'HPLmod3                   | AACGCGGTATGCAAGTGAACATCAGCGGCCATCAGCTAGATGTCACCGACGCCCTGCGCG  |
| 5'HPLmod4                   | GTTCCGGAGGCAGGTTGCTAAGGTCCGACTTACACACGGGCAACAAGGAG            |
| 5'HPLmod5                   | ACGCCAAGGTGTTCCGGACCGACCTTGCTAACCTGCCACTTACACACG              |
| 3'HPLmod1                   | TAGTCGCGCAGGGCGTTCGGTTACGTCCAACCTGATGGCCACTGATGTTGACTTGC      |
| 3'HPLmod3                   | CGCGCAGGGCGTTCGGTGACATCTAGCTGATGGCCGCTGATGTTCACTTGCATACCGCGTT |
| 3'HPLmod4                   | CTCCTTGTTGCCCGTGTGTAAGTCCGACCTTAGCAACCTGCCTCCGGAAC            |
| 3'HPLmod5                   | CGTGTGTAAGTGGCAGGTTAGCAAGGTCCGGAACACCTTGGCGT                  |
| 5'KpnI-RBS-SphI             | CACACATCTAGAATTAAGAGGAGAAATTAAGCATG                           |
| 3'KpnI-RBS-SphI             | CTTAATTTCTCCTCTTTAATTCTAGATGTGTGGTAC                          |
| <u>5'-RACE primers</u>      |                                                               |
| Poly adapter                | CACCTGAGCAGAGTGACGAGGACTACGGCTTCAGCTTTTTTTTTTTTTTTTTTTT       |
| Poly outer adapter          | CACCTGAGCAGAGTGACG                                            |
| hpf                         | GTCGATCAGCAGGTCGATGGCCGCG                                     |
| hpf nested                  | GTTCCGCATTGGCTACGATCTCG                                       |
| <u>RT-qPCR primers</u>      |                                                               |
| acp-For                     | ACTCGGCGTGAAGGAAGAAG                                          |
| acp-Rev                     | CGACGGTGTCAAGGGAGT                                            |
| eYFP-For                    | CACATGAAGCAGCAGACTT                                           |
| eYFP-Rev                    | GGTCTTGTAGTTGCCGTCGT                                          |
| UP-TSS1-F                   | GGGGAATGCTCGTCCACC                                            |
| Down-TSS1-F                 | AACCTGCCACTTACACACGG                                          |
| Hpf-R                       | CGTCCGTCACATCCAGTTGA                                          |

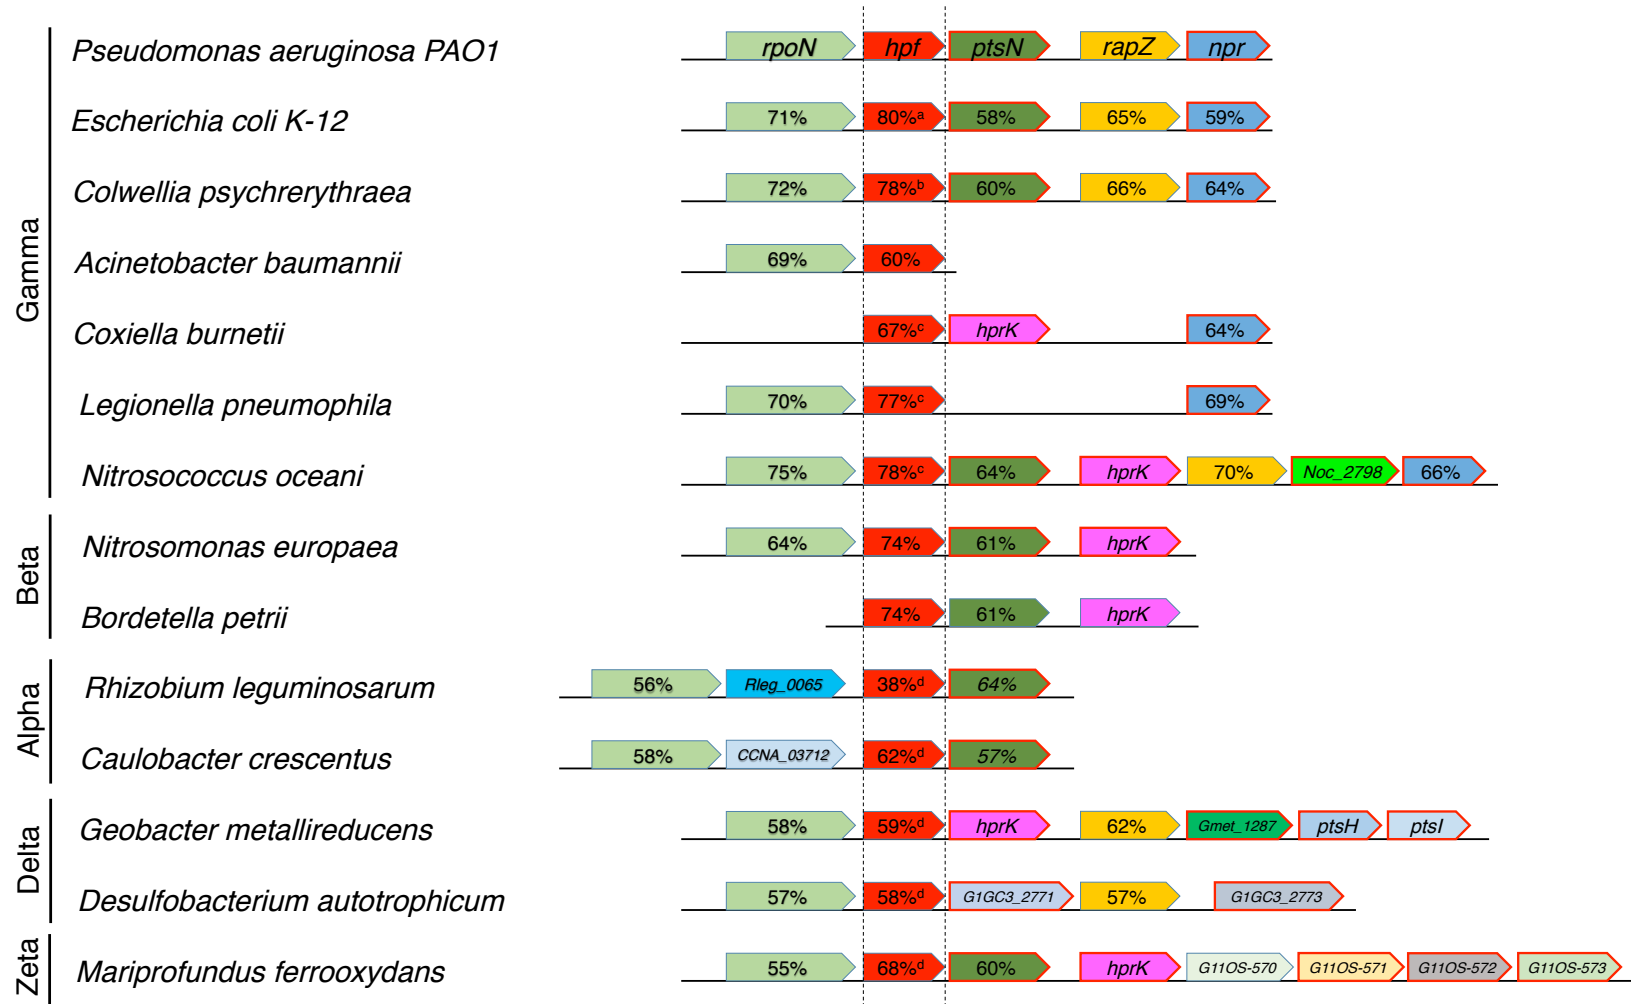

Fig S1. Schematic representation of *hpf* distribution among diverse species of bacteria, and the neighboring genes surrounding *hpf*. The percentages indicate the amino acid sequence similarity to the *Pseudomonas aeruginosa* PAO1 homologs. Letters indicate that one or more *hpf* paralogs are encoded by the representative organisms, with (a) indicating one paralog, (b) two paralogs, (c) one paralog with long HPF tail, (d) strains that contain a HPF with a long tail. Gene annotations are as follow: *rpoN*, RNA polymerase sigma-54 factor; *hpf*, hibernation promoting factor; *ptsN*, phosphotransferase system enzyme IIA(Ntr); *rapZ*, Rnase adaptor protein; *npr*, phosphorelay protein Npr; *hprK*, HPr kinase/phosphorylase; *Nco\_2798*, phosphotransferase system enzyme IIA(Fru); *Rleg\_0065*, hypothetical protein with 2 EamA domains; *CCNA\_03712*, hypothetical protein with ExoD domain; *Gmet\_1287*: phosphotransferase system, mannose-type, protein IIA; *ptsH*, phosphocarrier protein HPr; *ptsI*: phosphoenolpyruvate protein phosphotransferase.

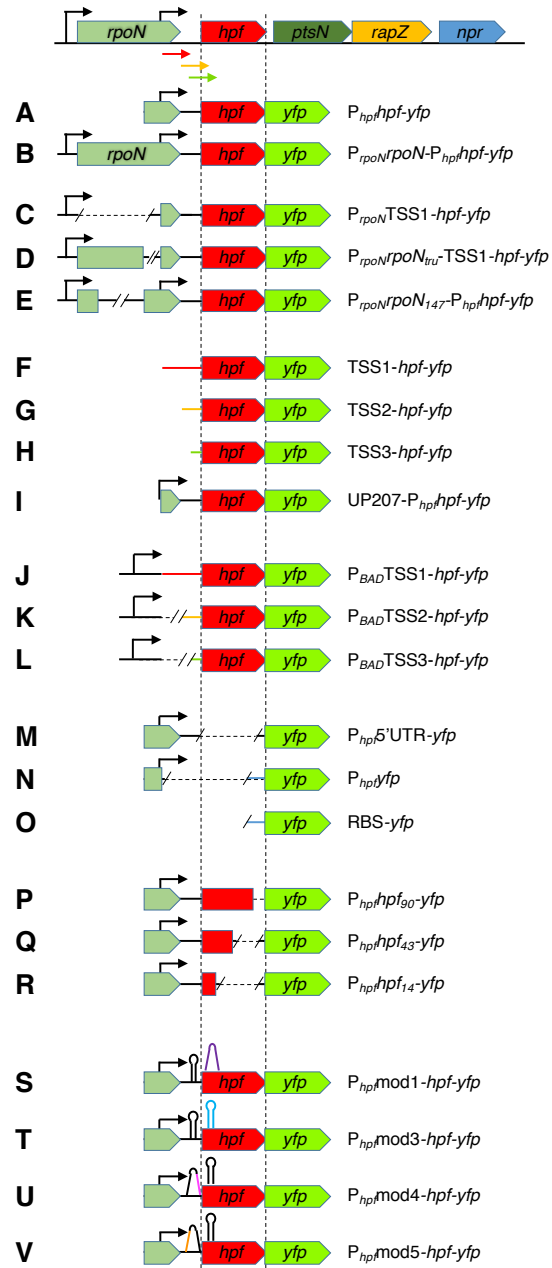

Fig S2. Schematic representation of reporter constructs used in these studies. The *hpf* gene is shown in red, and the *yfp* gene in green. Arrows indicate promoter sequences. Sites of hairpin loops are also shown in S through V.

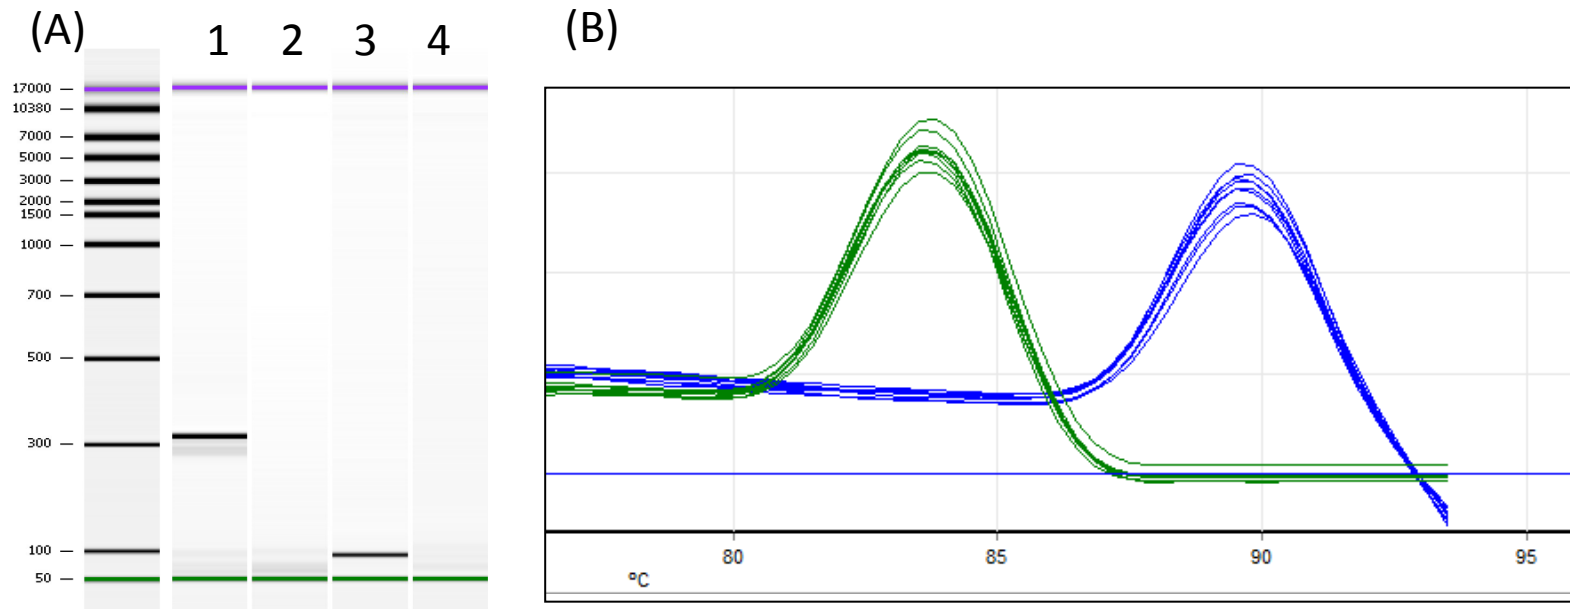

Fig S3. (A) Bioanalyzer Gel image of PCR products produced from primer upstream of  $P_{hpf}$  but downstream of  $P_{rpoN}$  (lanes 1, 2), showing transcriptional read-through from  $P_{rpoN}$  to  $hpf$ . Lane 2 was a control lacking reverse transcriptase. Bioanalyzer gel image of PCR product produced from a primer downstream of  $P_{hpf}$  (lane 3,4). Lane 4 lacked reverse transcriptase. (B) Melt curve analyses of PCR products from  $P_{hpf}$  promoter (green) and from  $P_{rpoN}$  promoter (blue). Each RT-qPCR experiment was performed with three biological replicates, and three technical replicates per biological replicate.

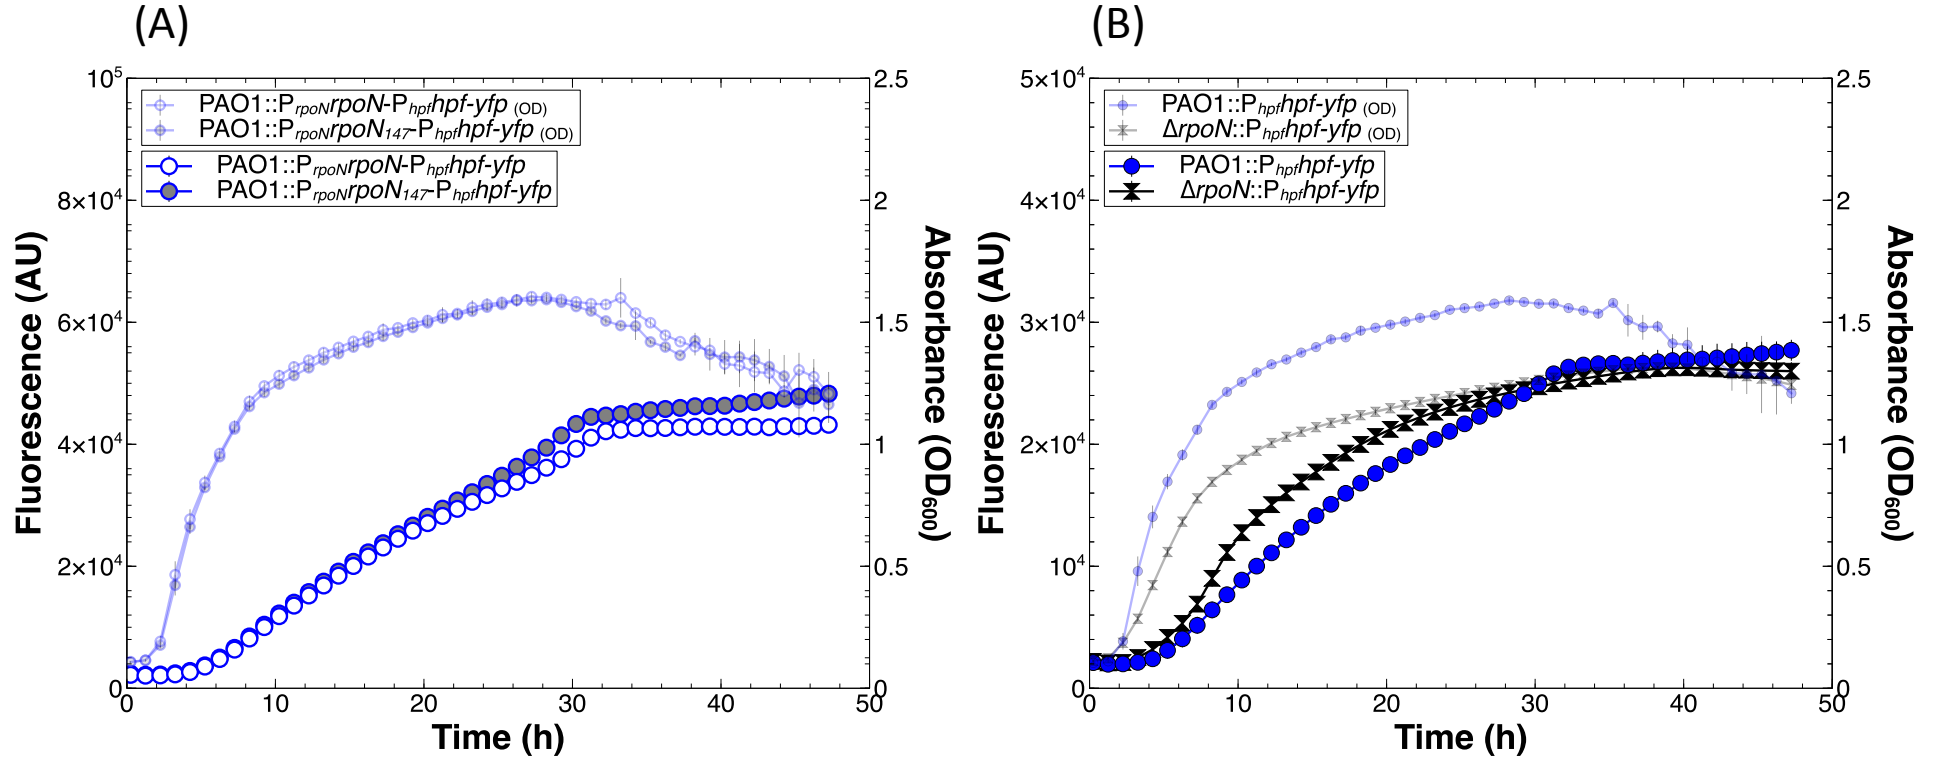

Fig S4. Effect of RpoN on expression of *hpf*. (A) Expression patterns (large symbols) and growth curves (small symbols) of HPF-YFP reporter constructs containing both the P<sub>rpoN</sub> and P<sub>hpf</sub> promoters with the reporter construct containing an intact *rpoN* gene (open circles) and with the *rpoN* gene truncated (closed circles) (constructs B and E from Fig S2). (B) Growth curves (small symbols) and expression of *hpf* from P<sub>hpf</sub> in the wild-type strain (closed circles) and in a *rpoN* deletion mutant (hourglass) (construct A from Fig S2). The results show that RpoN is not required for expression from P<sub>hpf</sub>. Data show the average and standard deviations from three biological replicates.



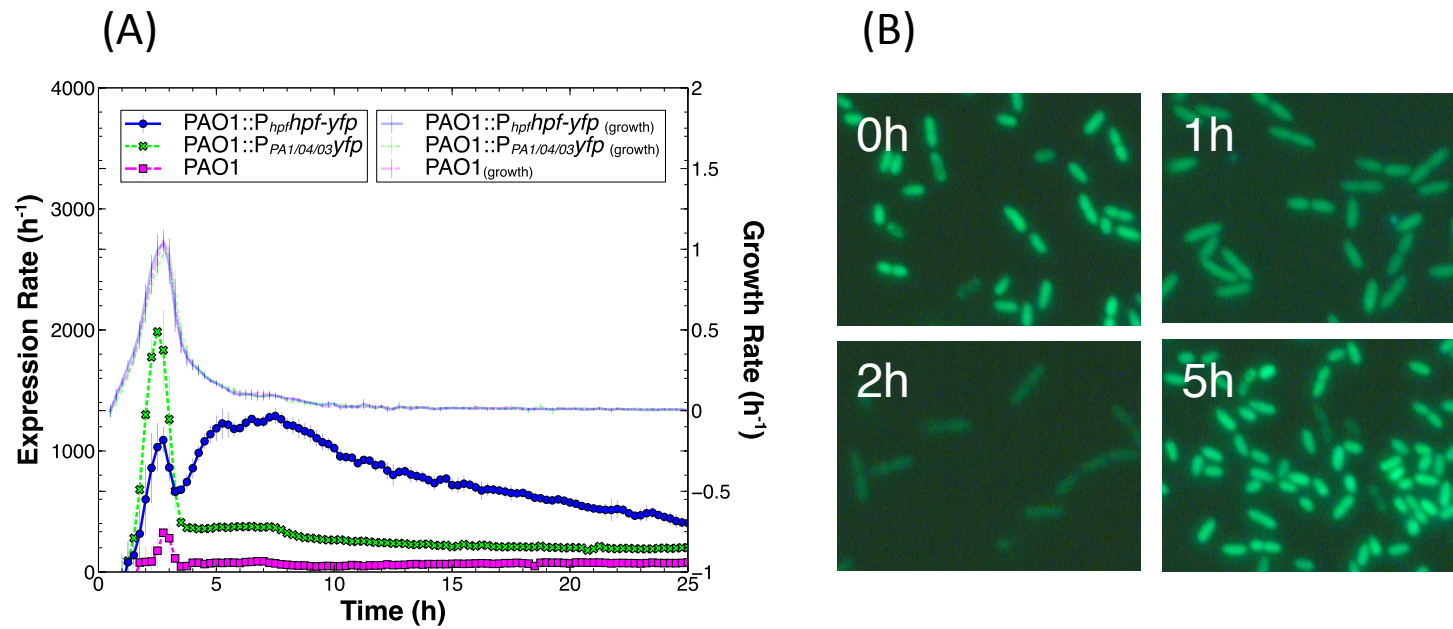

Fig S5. Growth phase dependence expression of *hpf*. (A) Expression rate (dark blue) and growth rate (light blue) were calculated based on the increases in optical density and fluorescence from the P<sub>hpf</sub>-*hpf-yfp* reporter. (B) Epifluorescence micrographs showing fluorescence of individual cells containing the P<sub>hpf</sub>-*hpf-yfp* reporter over time.

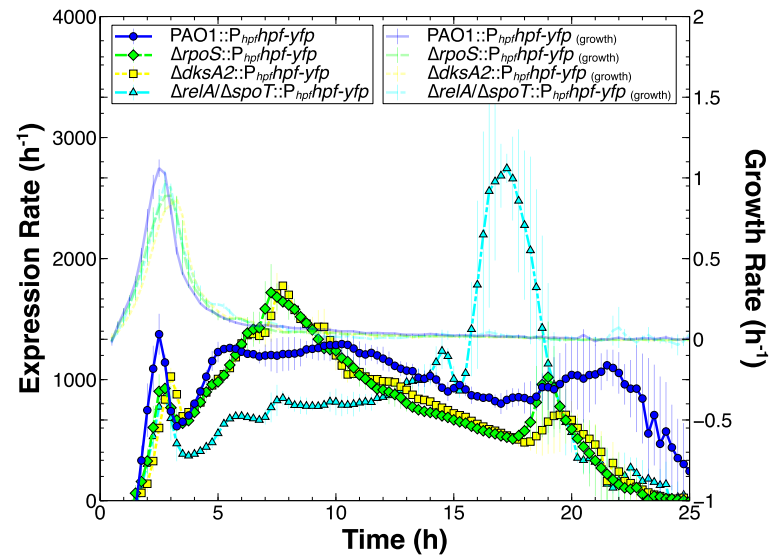

FigS6. Growth rate (lines) and expression rate of  $P_{hpf}$  (symbols) in mutants strains impaired in stationary phase factors, *rpoS* (green diamonds) *dksA2* (yellow squares) and ppGpp production (blue triangles). The  $P_{hfp}$  expression rate in the wild-type strain is shown (blue circles) for comparison. Expression rate of  $P_{hpf}$  is moderately inhibited during stationary phase of the *rpoS* and *dksA2* mutants.

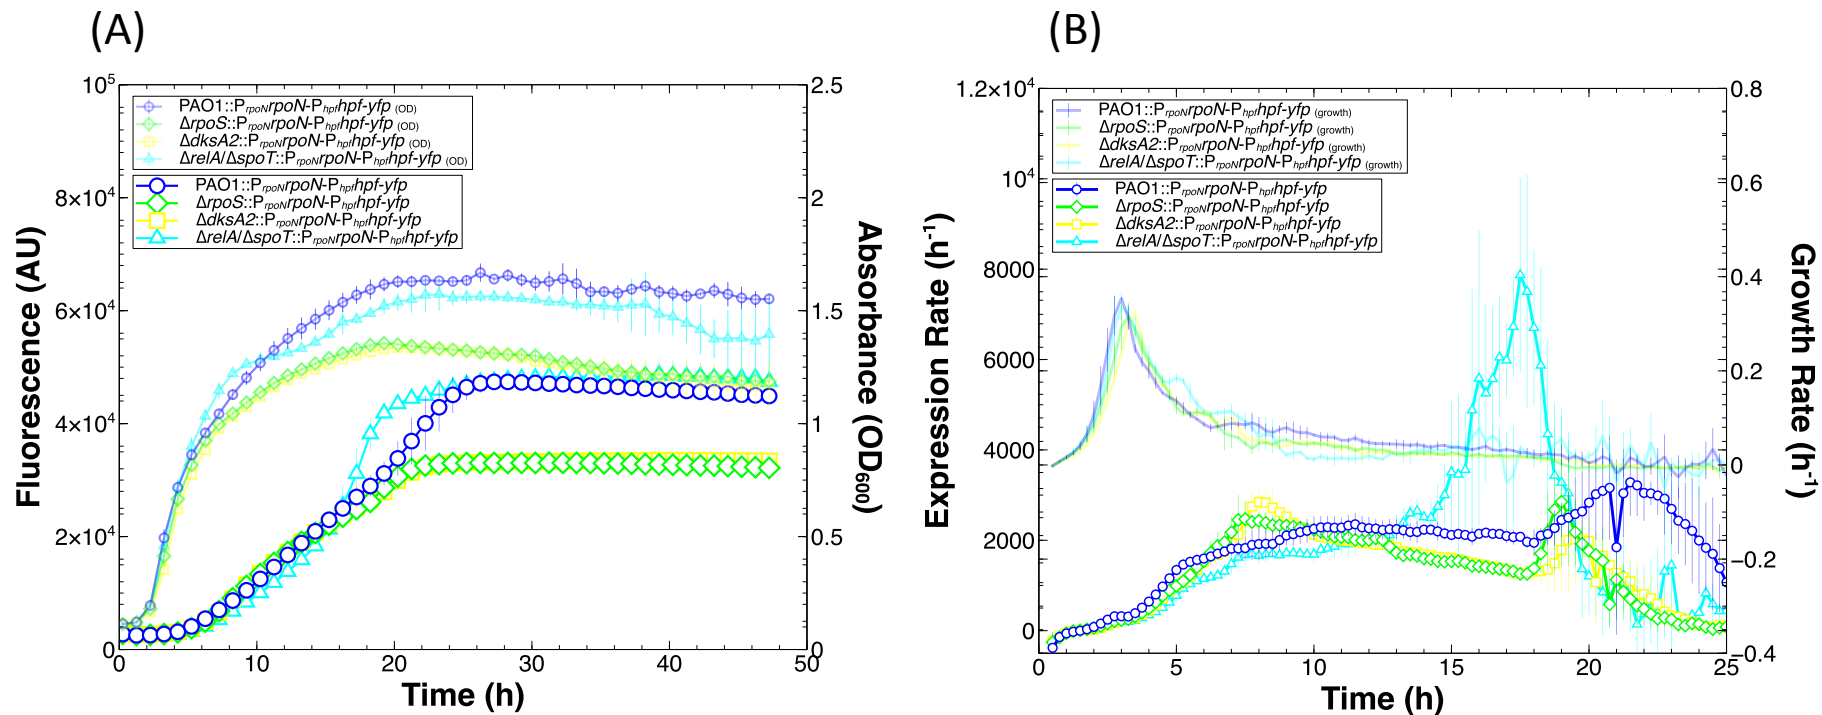

Fig 7S. Effect of stationary phase factors on expression (large symbols) from P<sub>rpoN</sub>-rpoN-P<sub>hpf</sub> hpf-yfp reporter. (A) Expression from both P<sub>rpoN</sub> and P<sub>hpf</sub> in the rpoS mutant (green circles) and dksA2 mutant (yellow squares) compared to the wild-type strain (blue circles). The mutant defective in ppGpp production (blue triangles) had a similar pattern of expression as in the reporter construct lacking P<sub>rpoN</sub>. (B) Growth rate (lines) and expression rates (symbols) for the rpoS, dksA2, and relA/spoT mutants calculated from the growth and expression data in (A).

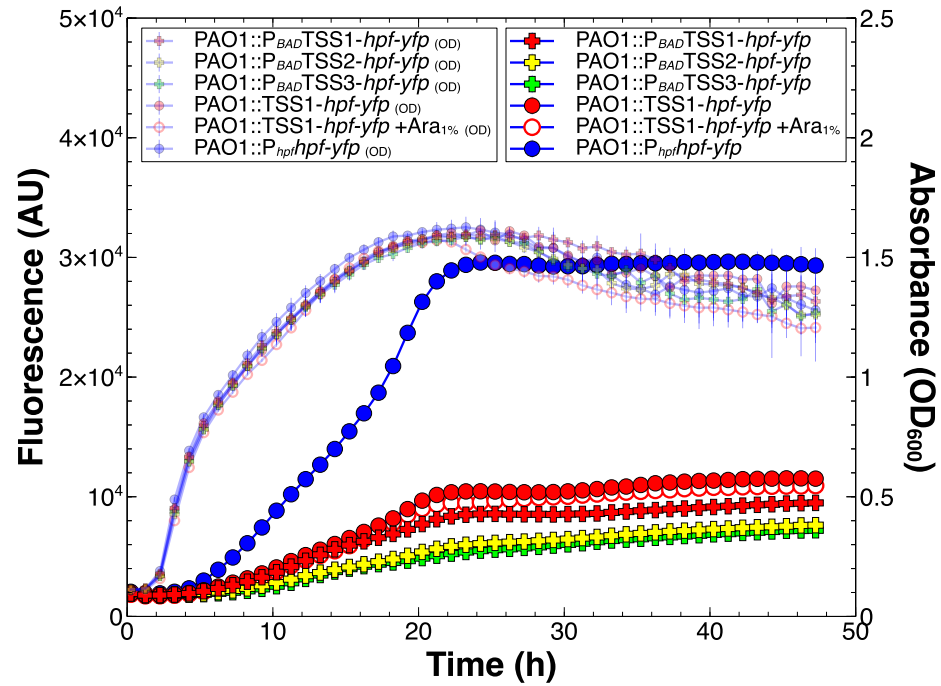

FigS8. Growth (small symbols) and expression of *hpf-yfp* reporter with the  $P_{hpf}$  promoter replaced by the  $P_{BAD}$  promoter, in the absence of arabinose induction. The  $P_{BAD}$  promoter was placed in orientation for expression from TSS1 (red symbols), TSS2 (yellow symbols), and TSS3 (green symbols). Expression from  $P_{hpf}$  (blue circles) is shown as a positive control.

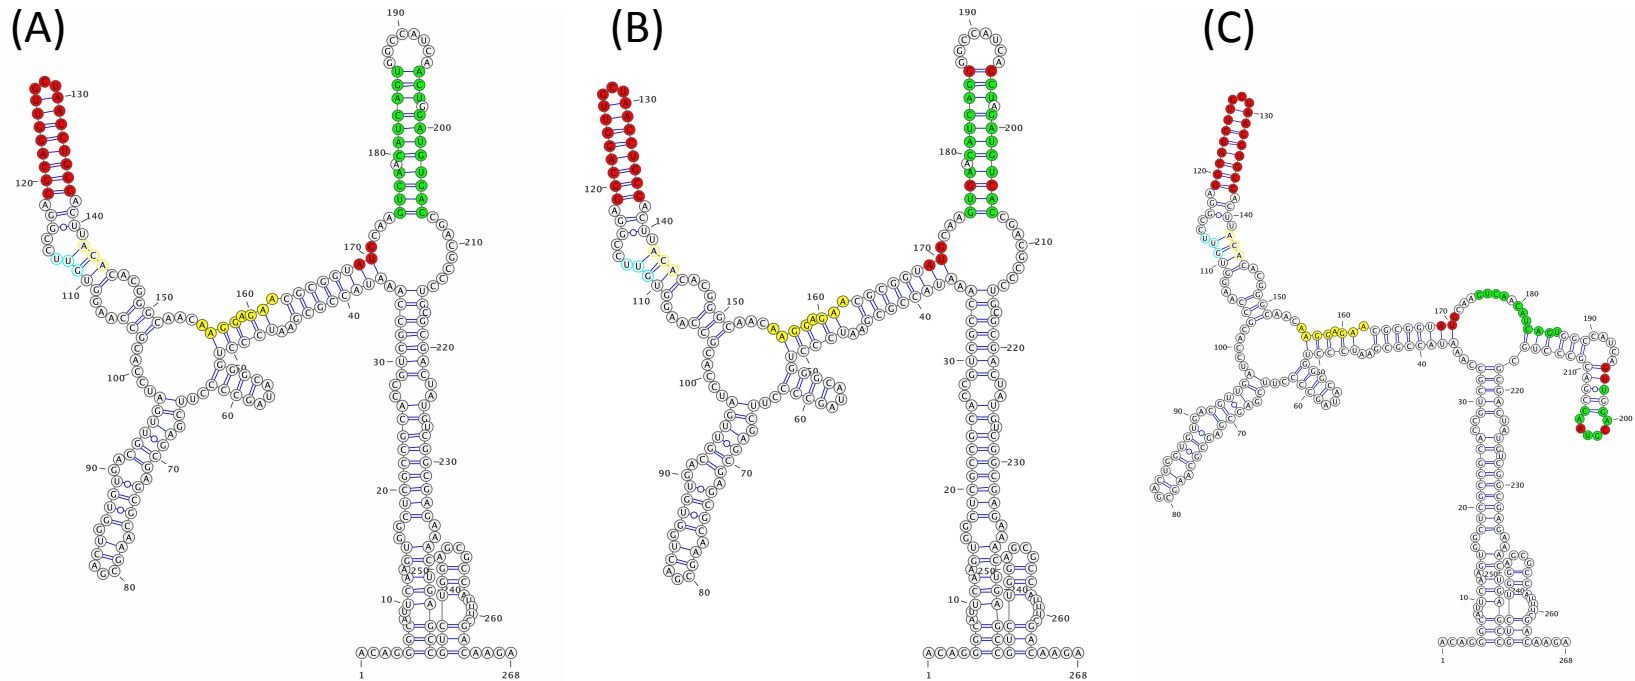

Fig S9. Secondary structure predictions of the *hpf* mRNA wild-type sequence, starting from TSS1 through the first 100 nucleotides of the *hpf* structural gene, as predicted by RNAfold server and visualized using VARNAs (Lorenz et al., 2011). Shown in red is the stable hairpin loop in the 5' UTR. Also shown in red is the *hpf* start codon. Shown in blue is the site of TSS2 and yellow is the site of TSS3. The hairpin loop (HPL) shown in green is downstream of the start codon, and is the HPL modified by mod 1 and mod 3. (B) The HPL structure predicted by RNAfold after mod1, creating an open 5' end of the *hpf* mRNA. (C) The HPL predicted by RNAfold after mod3, which creates a tighter HPL structure.
